CORRECTION

## Correction: Name use by companion parrots

The *PLOS One* Staff

The ORCID iDs are missing for the third, fourth, and fifth author. Please see the authors' respective ORCID iDs here:

- Author Marisa Hoeschele's ORCID iD is: 0000-0002-2102-0882 (<https://orcid.org/0000-0002-2102-0882>).
- Author Eva Reinisch's ORCID iD is: 0000-0002-1400-5473 (<https://orcid.org/0000-0002-1400-5473>).
- Author Christine R. Dahlin's ORCID iD is: 0000-0002-8301-519X (<https://orcid.org/0000-0002-8301-519X>).

The publisher apologizes for the error.

### Reference

1. Benedict L, Groiss V, Hoeschele M, Reinisch E, Dahlin CR. Name use by companion parrots. *PLoS One*. 2026;21(4):e0346830. <https://doi.org/10.1371/journal.pone.0346830> PMID: [41996408](https://pubmed.ncbi.nlm.nih.gov/41996408/)

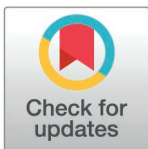

### OPEN ACCESS

**Citation:** The *PLOS One* Staff (2026) Correction: Name use by companion parrots. *PLoS One* 21(5): e0349699. <https://doi.org/10.1371/journal.pone.0349699>

**Published:** May 20, 2026

**Copyright:** © 2026 The *PLOS One* Staff. This is an open access article distributed under the terms of the [Creative Commons Attribution License](https://creativecommons.org/licenses/by/4.0/), which permits unrestricted use, distribution, and reproduction in any medium, provided the original author and source are credited.
